# Supplementary material for: Cancer-Derived Extracellular Vesicle-Associated MicroRNAs in Intercellular Communication: One Cell’s Trash Is Another Cell’s Treasure
Source: PubMed Central journal article supplement (PMC6940802; doi:10.3390/ijms20246109), 2019-12-04
Supplement: ijms-20-06109-s001.pdf [file ijms-20-06109-s001.pdf]

**Supplementary Table 1.** Clinical trials listed on clinicaltrials.gov analyzing cfmiRs in body fluids as cancer biomarkers.

| <b>Name of the Study</b>                                                                                                                                                               | <b>Disease</b>   | <b>Phase</b> | <b>miR</b> | <b>Sample Source</b>       | <b>NCT Identifier</b> |
|----------------------------------------------------------------------------------------------------------------------------------------------------------------------------------------|------------------|--------------|------------|----------------------------|-----------------------|
| Effect of Remote Ischaemic Conditioning in Oncology Patients (ERIC-ONC)                                                                                                                | All tumors       | NA           | cfmiR      | Blood                      | NCT02471885           |
| A Phase 1b Study of Axitinib In Combination with Crizotinib In Patients with Advanced Solid Tumors                                                                                     | Solid tumors     | Phase I      | cfmiR      | Blood                      | NCT01999972           |
| A Phase 1/2A Study of Minerval in Adult Patients with Advanced Solid Tumours                                                                                                           | Solid tumors     | Phase I/II   | cfmiR      | Blood                      | NCT01792310           |
| Oral Histone Deacetylase Inhibitor 4SC-202 in Patients with Advanced Hematologic Malignancies (TOPAS)                                                                                  | Solid tumors     | Phase I      | cfmiR      | Blood                      | NCT01344707           |
| Plasma miRs Predict Radiosensitivity of Different Fractionation Regimes in Palliative Radiotherapy for Advanced Non-Small Cell Lung Cancer : Multicenter Controlled Study (RadimiR-01) | NSCLC            | NA           | cfmiR      | Blood                      | NCT03074175           |
| Papaverine Hydrochloride and Stereotactic Body Radiation Therapy in Treating Patients with Non-small Cell Lung Cancer                                                                  | NSCLC            | Phase I      | cfmiR      | Blood                      | NCT03824327           |
| Plasma miR Profiling as First Line Screening Test for Lung Cancer Detection: A Prospective Study (BIOMILD)                                                                             | NSCLC            | NA           | cfmiR      | Blood                      | NCT02247453           |
| Early Lung Cancer Detection in High Risk Individuals (MILD)                                                                                                                            | NSCLC            | NA           | cfmiR      | Blood                      | NCT02837809           |
| Identification of Predictive and Prognostic Markers for Lung Cancer with Metastases                                                                                                    | NSCLC            | NA           | cfmiR      | Blood                      | NCT02301858           |
| Micro RNA Genetic Signature in NSCLC Egyptian Patients                                                                                                                                 | NSCLC            | NA           | cfmiR      | Blood, BAL                 | NCT02445924           |
| Blood Samples from Patients with Non-Small Cell Lung Cancer and From Healthy Volunteers                                                                                                | Lung cancer      | NA           | cfmiR      | Blood                      | NCT00897234           |
| The Effect of Berries on Lung Cancer Tumors                                                                                                                                            | Lung cancer      | NA           | cfmiR      | Blood                      | NCT00681512           |
| Monitoring the Changes of Tumor-related Biomarkers Before and After Pulmonary Nodule Biopsy                                                                                            | Lung cancer      | NA           | cfmiR      | Blood                      | NCT03397355           |
| Bronchoscopy Assisted by Electromagnetic Navigation (EMN) in the Diagnosis of Small Pulmonary Nodules                                                                                  | Pulmonary nodule | Phase II     | cfmiR      | Blood, BAL, exhaled breath | NCT01779388           |
| ATREUS - Phase II Study on the Activity of Trabectedin in Patients with Malignant Pleural Mesothelioma (MPM) (ATREUS)                                                                  | MPM              | Phase II     | cfmiR      | Blood                      | NCT02194231           |

|                                                                                                              |                             |           |       |       |             |
|--------------------------------------------------------------------------------------------------------------|-----------------------------|-----------|-------|-------|-------------|
| Ramucirumab and Carbo-Paclitaxel for Untreated Thymic Carcinoma / B3 Thymoma With Carcinoma (RELEVENT)       | Thymoma                     | Phase II  | cfmiR | Blood | NCT03921671 |
| Adapted Physical Activity (APA) in a Breast Cancer Population.                                               | Breast cancer               | NA        | cfmiR | Blood | NCT03528473 |
| Carvedilol Effect in Preventing Chemotherapy - Induced Cardiotoxicity (Ceccy)                                | Breast cancer               | Phase III | cfmiR | Blood | NCT01724450 |
| Circulating miRs as Biomarkers of Hormone Sensitivity in Breast Cancer (MIRHO)                               | Breast cancer               | Phase IV  | cfmiR | Blood | NCT01612871 |
| STI.VI. Study: How to Improve Lifestyles in Screening Contexts (STIVI)                                       | Breast cancer, Colon cancer | NA        | cfmiR | Blood | NCT03118882 |
| Identification and Evaluation of Biomarkers of Resistance to Neoadjuvant Chemotherapy (IDEA SEIN) (IDEASEIN) | Breast cancer               | NA        | cfmiR | Blood | NCT03255486 |
| Circulating MiR as Biomarker of Cardiotoxicity in Breast Cancer                                              | Breast cancer               | NA        | cfmiR | Blood | NCT02065908 |
| Circulating miRs. ICORG 10-11, V2                                                                            | Breast cancer               | NA        | cfmiR | Blood | NCT01722851 |
| miR and Relevant Biomarkers of BC Patients Undergoing Neoadjuvant Treatment                                  | Breast cancer               | NA        | cfmiR | Blood | NCT03779022 |
| The Andromeda Study. Predictive Value of Combined Criteria to Tailor Breast Cancer Screening                 | Breast cancer               | NA        | cfmiR | Blood | NCT02618538 |
| Imaging Patients for Cancer Drug Selection-Metastatic Breast Cancer (IMPACT-MBC)                             | Breast cancer               | NA        | cfmiR | Blood | NCT01957332 |
| REBECCA Study (Radiotherapy for Breast Cancer and Cardiotoxicity) (REBECCA)                                  | Breast cancer               | NA        | cfmiR | Blood | NCT02079272 |
| Anti-proliferative Effects of Vitamin D and Melatonin in Breast Cancer (MELO-D)                              | Breast cancer               | Phase II  | cfmiR | Blood | NCT01965522 |
| Pregnant Breast Cancer: Early/Advanced/Metastatic (PRAEGNANT)                                                | Breast cancer               | NA        | cfmiR | Blood | NCT02338167 |
| Breast Cancer and Cardiotoxicity Induced by RAdioTherapy: the BACCARAT Study (BACCARAT)                      | Breast cancer               | NA        | cfmiR | Blood | NCT02605512 |
| Early Detection of Cardiovascular Changes After Radiotherapy for Breast Cancer (EARLY-HEART)                 | Breast cancer               | NA        | cfmiR | Blood | NCT03297346 |
| Timisnar-Biomarkers Satellite Study (Timisnar-miR) (TiMiSNAR-miR)                                            | Rectal cancer               | NA        | cfmiR | Blood | NCT03962088 |

|                                                                                                                                                                                                                                                                             |                   |            |               |                                   |             |
|-----------------------------------------------------------------------------------------------------------------------------------------------------------------------------------------------------------------------------------------------------------------------------|-------------------|------------|---------------|-----------------------------------|-------------|
| Atu027 Plus Gemcitabine in Advanced or Metastatic Pancreatic Cancer (Atu027-I-02) (Atu027-I-02)                                                                                                                                                                             | Pancreatic cancer | Phase I/II | cfmiR         | Blood                             | NCT01808638 |
| Detection of MiR-25 in the Diagnosis of Pancreatic Cancer                                                                                                                                                                                                                   | Pancreatic cancer | NA         | cfmiR         | Blood                             | NCT03432624 |
| A Prospective Translational Tissue Collection Study in Early and Advanced Pancreatic Ductal Adenocarcinoma and Pancreatic Neuroendocrine Tumours to Enable Further Disease Characterisation and the Development of Potential Predictive and Prognostic Biomarkers (PaC-MAn) | Pancreatic cancer | NA         | cfmiR         | Blood, urine, feces, saliva, bile | NCT03840460 |
| U01-Biomarkers for Noninvasive and Early Detection of Pancreatic Cancer                                                                                                                                                                                                     | Pancreatic cancer | NA         | cfmiR, exomiR | Blood                             | NCT03886571 |
| Validation of Useful Markers Generated by Next Generation Bio-data Based Genome Research and Cohort Study (miR_Chip)                                                                                                                                                        | Pancreatic cancer | NA         | cfmiR         | Blood                             | NCT02807896 |
| Colorectal Cancer Detected by 1H-NMR Spectroscopy (BIOCOR)                                                                                                                                                                                                                  | Colon cancer      | NA         | cfmiR         | Blood                             | NCT02364154 |
| A Biomarker Study in Patients Getting Regorafenib for Metastatic Colorectal Cancer                                                                                                                                                                                          | Colon cancer      | Phase II   | cfmiR         | Blood                             | NCT02402036 |
| Biomarkers for the Early Diagnosis, Prediction, Prognosis for Colorectal Cancers                                                                                                                                                                                            | Colon cancer      | Phase I    | cfmiR         | Blood                             | NCT01828918 |
| Predictive and Prognostic Value of Inflammatory Markers and miR in Stage IV Colorectal Cancer                                                                                                                                                                               | Colon cancer      | NA         | cfmiR         | Blood                             | NCT04149613 |
| The Effects of Replacing Red and Processed Meat with Quorn on Biomarkers of Gut Health (MYCOMEAT)                                                                                                                                                                           | Colon cancer      | NA         | cfmiR         | Blood                             | NCT03944421 |
| ColoCare Study-Colorectal Cancer Cohort                                                                                                                                                                                                                                     | Colon cancer      | NA         | cfmiR         | Blood, urine, feces, saliva       | NCT02328677 |
| Prediction Model of Response for CCRT in Esophageal Cancer                                                                                                                                                                                                                  | Esophageal cancer | NA         | cfmiR         | Blood                             | NCT03081988 |
| The Utility of Circulating Tumour Cells and Plasma miR in Esophageal Adenocarcinoma                                                                                                                                                                                         | Esophageal cancer | NA         | cfmiR         | Blood                             | NCT02812680 |
| Prediction Model of Response for CCRT in Esophageal Cancer                                                                                                                                                                                                                  | Esophageal cancer | NA         | cfmiR         | Blood                             | NCT03081988 |
| Predicting Biomarker of Gastric Cancer Chemotherapy Response                                                                                                                                                                                                                | Gastric cancer    | NA         | cfmiR         | Blood                             | NCT03253107 |
| Genetic Profiling of Liver Cancer in Patients Undergoing Liver Transplantation                                                                                                                                                                                              | HCC               | NA         | cfmiR         | Blood                             | NCT02412579 |
| Clinical Significance of Hepatic and Circulating miRs miR-221 and miR-222 in Hepatocellular Carcinoma                                                                                                                                                                       | HCC               | NA         | cfmiR         | Blood                             | NCT02928627 |

|                                                                                                                                                          |                       |           |       |              |             |
|----------------------------------------------------------------------------------------------------------------------------------------------------------|-----------------------|-----------|-------|--------------|-------------|
| Fingerprint Characterization of Sorafenib Treated HCC (HCC-e:Med2)                                                                                       | HCC                   | NA        | cfmiR | Blood        | NCT03958669 |
| Study of miRs as a Diagnostic Tool for HCV-related Hepatocellular Carcinoma                                                                              | HCC                   | NA        | cfmiR | Blood        | NCT03429530 |
| miRs as Diagnostic Biomarkers in Hepatocellular Carcinoma Among Somali Patients                                                                          | HCC                   | NA        | cfmiR | Blood        | NCT03227510 |
| Impact of IL-28B rs12979860 and rs4803217 Gene Polymorphisms Associated With miRs Deregulation on HCV-related Hepatocellular Carcinoma                   | HCC                   | NA        | cfmiR | Blood        | NCT02507882 |
| Exploration of Molecular Biomarkers for Lu-177 DOTATATE Therapy in Midgut Neuroendocrine Tumor (GENEBIOLuNET)                                            | Neuroendocrine tumors | NA        | cfmiR | Blood        | NCT03667092 |
| miR Profiles Identification in Adeno Carcinoma Prostate Cancer                                                                                           | Prostate              | NA        | cfmiR | Blood        | NCT02964351 |
| Evaluating the Impact of Prostate Only Versus Pelvic Radiation for N+ Prostate Cancer. (PROPER)                                                          | Prostate cancer       | Phase III | cfmiR | Blood        | NCT02745587 |
| Personalizing Enzalutamide Therapy by Understanding the Relation Between Tumor mRNAs, miRs and Treatment Response (ILUMINATE)                            | Prostate cancer       | NA        | cfmiR | Blood        | NCT02471469 |
| Abiraterone Acetate in Treating Patients with Metastatic Hormone-Resistant Prostate Cancer                                                               | Prostate cancer       | Phase II  | cfmiR | Blood        | NCT01503229 |
| The Potential Role of miR-155 And Telomerase Reverse Transcriptase in Diagnosis of Non-Muscle Invasive Bladder Cancer and Their Pathological Correlation | Bladder cancer        | NA        | cfmiR | NA           | NCT03591367 |
| Studying Genes in Samples from Younger Patients with Adrenocortical Tumor                                                                                | Adrenocortical tumors | NA        | cfmiR | Blood        | NCT01528956 |
| miR Expression in Renal Cell Carcinoma                                                                                                                   | RCC                   | NA        | cfmiR | Blood, urine | NCT00743054 |
| Study of Hydroxychloroquine Before Surgery in Patients with Primary Renal Cell Carcinoma                                                                 | RCC                   | Phase I   | cfmiR | Blood        | NCT01144169 |
| Cohort of Patients with Pelvic Gynecological Cancer: Constitution of a Collection of Biological Samples with Radioclinic Characterization (PELVIMASS2)   | Gynecological cancer  | NA        | cfmiR | Blood        | NCT03622983 |

|                                                                                                                                  |                                   |          |       |               |             |
|----------------------------------------------------------------------------------------------------------------------------------|-----------------------------------|----------|-------|---------------|-------------|
| Exploring the Potential of Novel Biomarkers Based on Plasma miRs for a Better Management of Pelvic Gynecologic Tumors (GYNO-MIR) | Gynecological cancer              | NA       | cfmiR | Blood         | NCT03776630 |
| Urinary miR in Endometrial Cancer Study                                                                                          | Endometrial cancer                | NA       | cfmiR | Urine         | NCT03824613 |
| Search for Predictors of Therapeutic Response in Ovarian Carcinoma (miRSa)                                                       | Ovarian cancer                    | NA       | cfmiR | Blood         | NCT01391351 |
| Molecular Mechanisms Leading to Chemoresistance in Epithelial Ovarian Cancer (CHEMOVA)                                           | Ovarian cancer                    | NA       | cfmiR | Blood, urine  | NCT02758652 |
| Studying Tissue and Blood Samples from Patients with Acute Myeloid Leukemia                                                      | AML                               | NA       | cfmiR | Blood         | NCT00900224 |
| Evaluation of ProALL miRs in Blood Specimen for Prediction of ALL Relapse Risk                                                   | B-ALL                             | NA       | cfmiR | Blood         | NCT03000335 |
| Identification of Hematological Malignancies and Therapy Predication Using miRs as a Diagnostic Tool                             | Hematological malignancies        | NA       | cfmiR | Blood         | NCT02791217 |
| Establishment of a Signature of Circulating miR as a Tool to Aid Diagnosis of Primary Brain Tumors in Adults (MIR)               | Brain tumors                      | NA       | cfmiR | Blood         | NCT03630861 |
| Evaluating the Expression Levels of MiR-10b in Patients with Gliomas                                                             | Glioma                            | NA       | cfmiR | Blood, CSF    | NCT01849952 |
| Blood Biomarker Signature in Glioma                                                                                              | Glioma                            | NA       | cfmiR | Blood         | NCT03698201 |
| Gene Expression, Immunological Status and Metabolome in Glioma Patients                                                          | Glioma                            | NA       | cfmiR | Blood         | NCT01525459 |
| Pilot Phase 2 Study Whole Brain Radiation Therapy with Simultaneous Integrated Boost for Patients with Brain Metastases          | Brain metastasis from solid tumor | Phase II | cfmiR | Blood         | NCT03189381 |
| Preventative Trial of DFMO in Patients with High Risk Neuroblastoma in Remission                                                 | Neuroblastoma                     | Phase II | cfmiR | Blood         | NCT01586260 |
| Preventative Trial of Difluoromethylornithine (DFMO) in High Risk Patients with Neuroblastoma That is in Remission               | Neuroblastoma                     | Phase II | cfmiR | Blood         | NCT02395666 |
| MiRs in Patients with Neurofibromatosis Type 1                                                                                   | NF-1                              | NA       | cfmiR | Blood         | NCT01595139 |
| Tertiary Prevention of Head and Neck Cancer with a Dietary Intervention (DietINT)                                                | H&N cancer                        | Phase II | cfmiR | Blood, saliva | NCT02869399 |
| The Role of miR-29b in the Oral Squamous Cell Carcinoma (miR-29b)                                                                | Oral cancer                       | NA       | cfmiR | Blood, saliva | NCT02009852 |

|                                                                                                                       |                           |           |       |                   |             |
|-----------------------------------------------------------------------------------------------------------------------|---------------------------|-----------|-------|-------------------|-------------|
| Innovative Approach to Triage Oral Precancer (iTOP)                                                                   | Oral cancer               | NA        | cfmiR | Blood             | NCT03202810 |
| Cancer Chemoprevention by Metformin Hydrochloride Compared to Placebo in Oral Potentially Malignant Lesions           | Oral cancer               | Phase IV  | cfmiR | Saliva            | NCT03684707 |
| Cancer Chemoprevention by Metformin Hydrochloride in Oral Potentially Malignant Lesions                               | Oral cancer               | Phase III | cfmiR | Saliva            | NCT03685409 |
| Molecular Profile of Metastatic Sporadic Medullary Thyroid Cancer Patients and Correlation with Vandetanib            | Thyroid cancer            | NA        | cfmiR | Blood             | NCT02268734 |
| Biomarkers to Distinguish Benign from Malignant Thyroid Neoplasm                                                      | Thyroid cancer            | NA        | cfmiR | Blood             | NCT01433809 |
| Circulating miRs as Disease Markers in Pediatric Cancers                                                              | Pediatric tumors          | NA        | cfmiR | Blood, CSF        | NCT01541800 |
| Longitudinal Study of Biomarkers                                                                                      | Pediatric tumors          | NA        | cfmiR | Blood, CSF, urine | NCT01595126 |
| Approaches to Identify Early Biomarkers and Pathogenesis of Anthracycline Cardiotoxicity                              | Pediatric tumors          | NA        | cfmiR | Blood             | NCT04036045 |
| Defining Late Onset Occult Asymptomatic Cardiotoxicity in Childhood Cancer Survivors Exposed to Anthracycline Therapy | Pediatric tumors          | NA        | cfmiR | Blood             | NCT01671696 |
| Blood and Cerebrospinal Fluid for Pediatric Brain Tumor Research                                                      | Pediatric CNS tumors      | NA        | cfmiR | Blood, CSF        | NCT01556178 |
| Natural Berry Extract Treatment of Hemangiomas (Pediaberry)                                                           | Hemangioma                | Phase I   | cfmiR | Urine             | NCT04020419 |
| Discovery of Sirolimus Sensitive Biomarkers in Blood                                                                  | Lymphangioma myomatosis   | NA        | cfmiR | Blood, urine      | NCT03304678 |
| Volumetric Intensity Modulated Arc Therapy vs. Conventional Radiotherapy for Cancer Pain                              | Painful cancer metastasis | Phase II  | cfmiR | Blood             | NCT03374592 |
| Effect of Oral Propranolol on mRNA Expression in Symptomatic Cavernous Malformation                                   | Cavernous Malformation    | Phase II  | cfmiR | Blood             | NCT03474614 |

Abbreviations: NA, Not Available; NSCLC, Non-Small-Cell Lung Cancer; BAL, Bronchoalveolar Lavage; MPM, Malignant Pleural Mesothelioma; CCRT, Chemoradiotherapy; HCC, Hepatocellular Carcinoma; RCC, Renal Cell Carcinoma; AML, Acute Myeloid Leukemia; B-ALL, B-cell Acute Lymphoblastic Leukemia; DFMO, Difluoromethylornithine; H&N, Head and Neck Cancer; CSF, cerebrospinal fluid.
